# Supplementary material
Source: Springer Nature journal article supplement (https://www.springermedizin.de/resource/supplementary/12986_2008_166_MOESM2_ESM.pdf/25655606)

Quadriceps

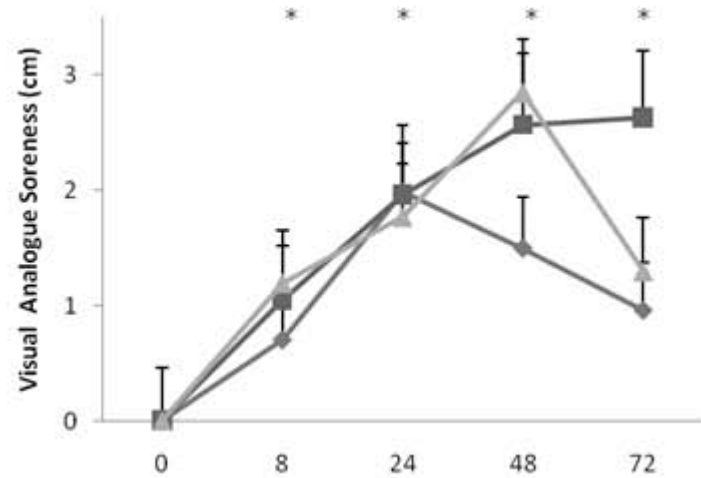

◆ HMB-Pre  
 ■ HMB-Post  
 ▲ Placebo

Time (hours)

Hamstrings

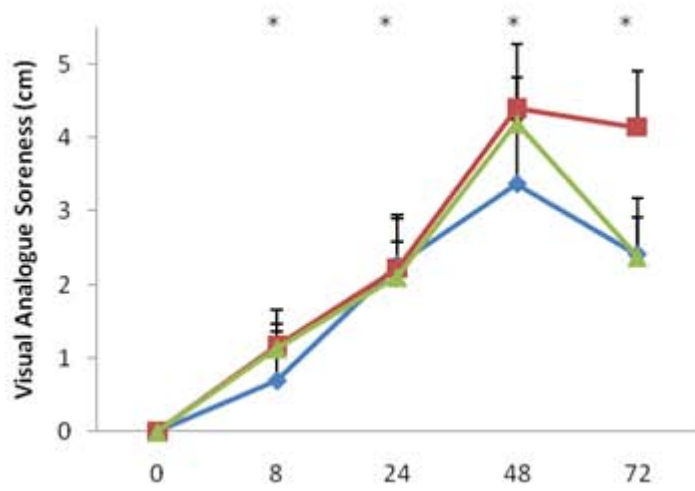

Visual Analogue Soreness (cm)

Supplement: MOESM2 [file 25655606]
